# Supplementary material for: External Validation of COVID-19 Risk Scores during Three Waves of Pandemic in a German Cohort—A Retrospective Study
Source: MDPI journal article supplement (doi:10.3390/jpm12111775), 2022-10-28
Supplement: s1 [file s1]

## Supplementary

**Table S1 Missing variables in calculation of scores for N=347**

| Missing Score variable  | Score                                     | First cohort<br>N (%) | Second cohort<br>N (%) | Third cohort<br>N (%) |
|-------------------------|-------------------------------------------|-----------------------|------------------------|-----------------------|
| Urea                    | 4C-Score                                  | 33 (24.6)             | 91 (48.7)              | 22 (84.6)             |
| Bilirubine              | COVID-GRAM                                | 11 (8.2)              | 42 (22.5)              | 7 (26.9)              |
| LDH                     | COVID-GRAM                                | 13 (9.7)              | 39 (20.9)              | 7 (26.9)              |
| Respiratory rate        | 4C-Score, qSOFA, CRB-65, NEWS             | 10 (7.5)              | 36 (19.3)              | 5 (19.2)              |
| Oxygen supply           | NEWS                                      | 10 (7.5)              | 27 (14.4)              | 5 (19.2)              |
| Oxygen saturation       | 4C-Score, NEWS                            | 10 (7.5)              | 27 (14.4)              | 5 (19.2)              |
| Temperature             | NEWS                                      | 9 (6.7)               | 26 (13.9)              | 5 (19.2)              |
| Systolic blood pressure | CRB-65, qSOFA, NEWS                       | 8 (6.0)               | 25 (13.4)              | 5 (19.2)              |
| Heart rate              | NEWS                                      | 8 (6.0)               | 24 (12.8)              | 5 (19.2)              |
| GCS                     | 4C-Score, CRB-65, qSOFA, COVID-GRAM, NEWS | 8 (6.0)               | 24 (12.8)              | 5 (19.2)              |
| CRP                     | 4C-Score                                  | 7 (5.2)               | 18 (9.6)               | 3 (11.5)              |

**Table S1.** Missing variables in calculation of scores at patients admission for N=347 patients of study population. Abbreviations: *COVID* Coronavirus Disease, *GRAM* Guangzhou Institute of Respiratory Health Calculator at Admission, *qSOFA* Quick Sequential Organ Failure Assessment, *CRB* Confusion, Respiratory rate, Blood pressure, *NEWS* National Early Warning Score, *LDH* Lactate dehydrogenase, *GCS* Glasgow Coma Scale, *CRP* C-reactive protein

**Table S2 Characteristics of excluded patients**

|                          | <b>CRB-65</b><br>N (% or Q1-<br>Q3) | <b>NEWS</b><br>N (% or Q1-<br>Q3) | <b>4C-Score</b><br>N (% or Q1-Q3) | <b>COVID-<br/>GRAM</b><br>N (% or Q1-<br>Q3) | <b>qSOFA</b><br>N (% or Q1-<br>Q3) |
|--------------------------|-------------------------------------|-----------------------------------|-----------------------------------|----------------------------------------------|------------------------------------|
| Overall                  | 51                                  | 66                                | 194                               | 98                                           | 51                                 |
| Female                   | 26 (51.0)                           | 35 (53.0)                         | 95 (49.0)                         | 55 (56.1)                                    | 26 (51.0)                          |
| Average age              | 59.3 (46.0-<br>76.0)                | 61.2 (50.0-<br>76.0)              | 62.9 (53.0-76.0)                  | 65.9 (59.0-<br>80.0)                         | 59.3 (46.0-<br>76.0)               |
| ICU admission            | 10 (19.6)                           | 17 (25.8)                         | 25 (12.9)                         | 16 (16.3)                                    | 10 (19.6)                          |
| In-hospital<br>mortality | 3 (5.9)                             | 6 (9.1)                           | 14 (7.2)                          | 8 (8.2)                                      | 3 (5.9)                            |
| <b>Cohort 1</b>          | <b>10 (19.6)</b>                    | <b>17 (25.8)</b>                  | <b>47 (24.2)</b>                  | <b>20 (20.4)</b>                             | <b>10 (19.6)</b>                   |
| Female                   | 4 (40.0)                            | 10 (58.8)                         | 22 (46.8)                         | 13 (65.0)                                    | 4 (40.0)                           |
| Average age              | 52.8 (33.8-<br>80.0)                | 56.1 (46.0-<br>74.0)              | 62.7 (50.0-80.0)                  | 64.9 (50.8-<br>80.8)                         | 52.8 (33.8-<br>80.0)               |
| ICU admission            | 5 (50.0)                            | 7 (41.2)                          | 14 (29.8)                         | 8 (40.0)                                     | 5 (50.0)                           |
| In-hospital<br>mortality | 2 (20.0)                            | 3 (17.6)                          | 10 (21.3)                         | 4 (20.0)                                     | 2 (20.0)                           |
| <b>Cohort 2</b>          | <b>36 (70.6)</b>                    | <b>44 (66.7)</b>                  | <b>124 (63.9)</b>                 | <b>66 (67.3)</b>                             | <b>36 (70.6)</b>                   |
| Female                   | 20 (55.6)                           | 23 (52.3)                         | 63 (50.8)                         | 36 (54.5)                                    | 20 (55.6)                          |
| Average age              | 61.9 (55.0-<br>76.0)                | 63.9 (56.0-<br>76.0)              | 63.8 (55.0-76.0)                  | 67.4 (60.0-<br>81.0)                         | 61.9 (55.0-<br>76.0)               |
| ICU admission            | 4 (11.1)                            | 9 (20.5)                          | 10 (8.1)                          | 7 (10.6)                                     | 4 (11.1)                           |
| In-hospital<br>mortality | 1 (2.8)                             | 3 (6.8)                           | 4 (3.2)                           | 4 (6.1)                                      | 1 (2.8)                            |
| <b>Cohort 3</b>          | <b>5 (9.8)</b>                      | <b>5 (7.6)</b>                    | <b>23 (11.9)</b>                  | <b>12 (12.2)</b>                             | <b>5 (9.8)</b>                     |
| Female                   | 2 (40.0)                            | 2 (40.0)                          | 10 (43.5)                         | 6 (50.0)                                     | 2 (40.0)                           |
| Average age              | 53.8 (36.0-<br>71.0)                | 53.8 (36.0-<br>71.0)              | 58.5 (48.0-68.0)                  | 59.5 (49.8-<br>68.0)                         | 53.8 (36.0-<br>71.0)               |
| ICU admission            | 1 (20.0)                            | 1 (20.0)                          | 1 (4.3)                           | 1 (8.3)                                      | 1 (20.0)                           |
| In-hospital<br>mortality | 0 (0)                               | 0 (0)                             | 0 (0)                             | 0 (0)                                        | 0 (0)                              |

**Table S2** Characteristics of excluded patients for each score studied. Abbreviations: *CRB* Confusion, Respiratory rate, Blood pressure, *NEWS* National Early Warning Score, *COVID* Coronavirus Disease, *GRAM* Guangzhou Institute of Respiratory Health Calculator at Admission, *qSOFA* Quick Sequential Organ Failure Assessment, *ICU* Intensive Care Unit

**Table S3 Discriminatory indices at several cut-offs of the scores<sup>1</sup>**

|                                                                                                                                                                             | Cut-off | Prevalence<br>(95% CI) | Sensitivity<br>(95% CI) | Specificity<br>(95% CI) | Positive<br>predictive<br>value (95% CI) | Negative<br>predictive<br>value (95% CI) |
|-----------------------------------------------------------------------------------------------------------------------------------------------------------------------------|---------|------------------------|-------------------------|-------------------------|------------------------------------------|------------------------------------------|
| <b>ICU-admission</b>                                                                                                                                                        |         |                        |                         |                         |                                          |                                          |
| qSOFA                                                                                                                                                                       | ≥2      | 24.3 (19.5-29.3)       | 15.3 (7.5-24.2)         | 98.2 (96.3-99.6)        | 73.4 (50.0-93.8)                         | 78.3 (73.4-83.1)                         |
| COVID-GRAM <sup>2</sup>                                                                                                                                                     | ≥1.7%   | -                      | -                       | -                       | -                                        | -                                        |
|                                                                                                                                                                             | ≥40.4%  | 26.5 (21.0-32.0)       | 98.5 (94.9-100)         | 3.8 (1.2-6.9)           | 27.0 (21.4-32.6)                         | 87.5 (57.1-100)                          |
| NEWS                                                                                                                                                                        | ≥5      | 22.9 (18.1-27.9)       | 89.0 (80.7-96.2)        | 64.1 (57.7-70.4)        | 42.5 (34.2-51.0)                         | 95.2 (91.3-98.5)                         |
|                                                                                                                                                                             | ≥7      | 22.9 (18.1-27.9)       | 67.1 (55.4-78.3)        | 81.8 (76.5-86.9)        | 52.4 (41.5-63.3)                         | 89.3 (84.7-93.4)                         |
| CRB-65                                                                                                                                                                      | ≥2      | 24.3 (19.5-29.3)       | 44.4 (32.8-56.2)        | 87.5 (82.9-91.6)        | 53.3 (40.4-66.1)                         | 83.0 (78.2-87.7)                         |
| 4C-Score                                                                                                                                                                    | ≥4      | 37.2 (29.6-45.0)       | 98.2 (94.0-100)         | 2.1 (0-5.4)             | 37.3 (29.6-45.2)                         | 66.5 (0-100)                             |
|                                                                                                                                                                             | ≥9      | 37.2 (29.6-45.0)       | 93.0 (85.7-98.4)        | 22.9 (14.8-31.6)        | 41.7 (33.1-50.4)                         | 84.6 (69.6-96.6)                         |
|                                                                                                                                                                             | ≥15     | 37.2 (29.6-45.0)       | 21.0 (10.9-32.0)        | 96.9 (92.9-100)         | 79.9 (57.1-100)                          | 67.4 (59.4-75.0)                         |
| <b>In-hospital mortality</b>                                                                                                                                                |         |                        |                         |                         |                                          |                                          |
| qSOFA                                                                                                                                                                       | ≥2      | 9.8 (6.5-13.3)         | 6.9 (0-17.6)            | 95.1 (92.4-97.5)        | 13.3 (0-33.3)                            | 90.4 (86.8-93.7)                         |
| COVID-GRAM <sup>2</sup>                                                                                                                                                     | ≥1.7%   | -                      | -                       | -                       | -                                        | -                                        |
|                                                                                                                                                                             | ≥40.4%  | 9.6 (6.1-13.5)         | 100                     | 3.6 (1.3-6.2)           | 9.9 (6.3-13.9)                           | 100                                      |
| NEWS                                                                                                                                                                        | ≥5      | 9.3 (6.0-12.9)         | 84.6 (69.2-96.7)        | 55.7 (49.6-61.7)        | 16.4 (10.4-23.0)                         | 97.2 (94.3-99.4)                         |
|                                                                                                                                                                             | ≥7      | 9.3 (6.0-12.9)         | 69.2 (50.0-86.4)        | 74.7 (69.2-80.0)        | 21.9 (13.3-31.4)                         | 95.9 (93.0-98.5)                         |
| CRB-65                                                                                                                                                                      | ≥2      | 9.8 (6.5-13.3)         | 48.3 (30.0-66.7)        | 82.7 (78.1-87.1)        | 23.3 (13.0-34.5)                         | 93.6 (90.4-96.6)                         |
| 4C-Score                                                                                                                                                                    | ≥4      | 11.8 (6.9-17.1)        | 100                     | 2.2 (0-5.1)             | 12.0 (7.1-17.5)                          | 100                                      |
|                                                                                                                                                                             | ≥9      | 11.8 (6.9-17.1)        | 100                     | 19.3 (12.8-26.1)        | 14.2 (8.5-20.6)                          | 100                                      |
|                                                                                                                                                                             | ≥15     | 11.8 (6.9-17.1)        | 33.3 (11.8-57.1)        | 93.3 (88.8-97.2)        | 40.1 (14.3-66.7)                         | 91.3 (86.3-95.7)                         |
| <sup>1</sup> Score cut-offs according to derivation literature                                                                                                              |         |                        |                         |                         |                                          |                                          |
| <sup>2</sup> COVID-GRAM risk of critical illness. We only assessed discriminatory indices at the higher cut-off because we had no patient with a score value less than 1.7% |         |                        |                         |                         |                                          |                                          |

**Table S3** Discriminatory indices at several clinical cut-offs of the scores (defined by international literature) regarding the overall study population. Abbreviations: *ICU* Intensive Care Unit, *qSOFA* Quick Sequential Organ Failure Assessment, *COVID* Coronavirus Disease, *GRAM* Guangzhou Institute of Respiratory Health Calculator at Admission, *NEWS* National Early Warning Score, *CRB* Confusion, Respiratory rate, Blood pressure

**Figure S1**

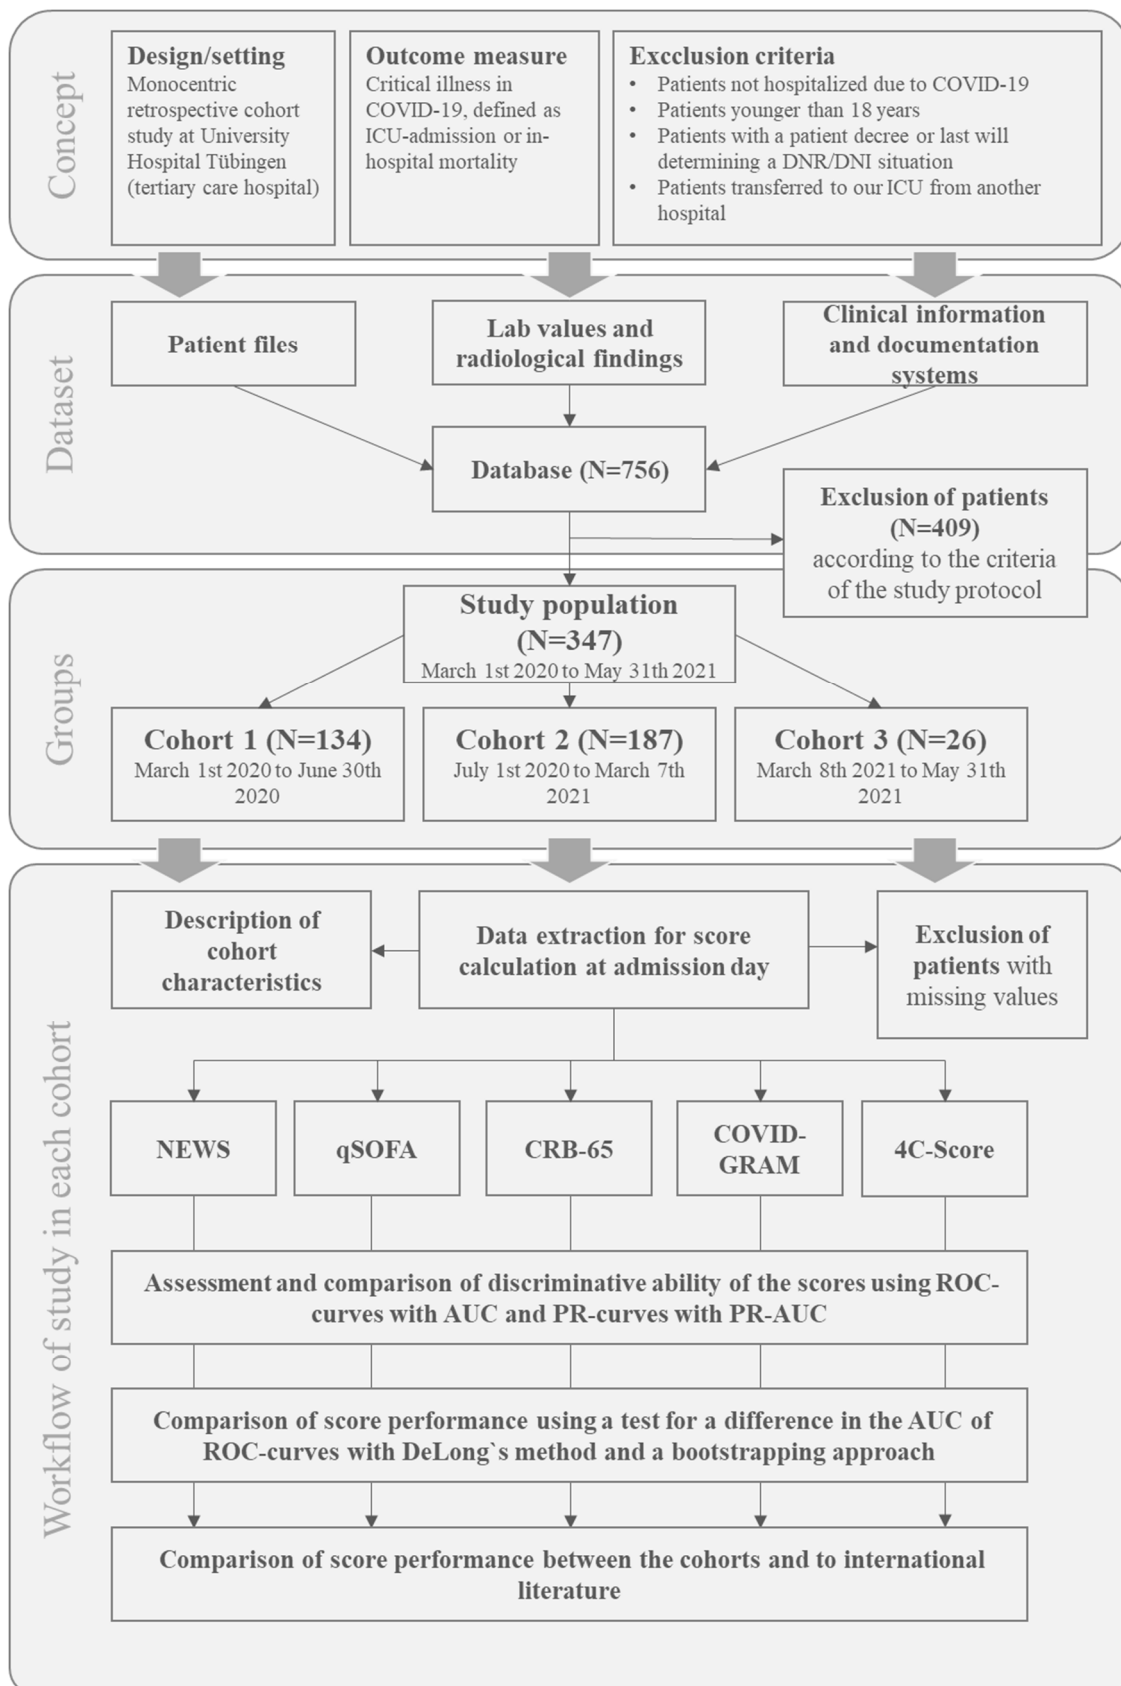

**Fig S1.** Schematic workflow of study. Study concept (upper panel), dataset and groups (middle panel), the workflow of score calculation, validation, and comparison in each cohort (lower panel). Abbreviations: *COVID* Coronavirus Disease, *ICU* Intensive Care Unit, *DNR* Do not intubate, *DNI* Do not resuscitate, *CRB* Confusion,

Respiratory rate, Blood pressure, *NEWS* National Early Warning Score, *GRAM* Guangzhou Institute of Respiratory Health Calculator at Admission, *qSOFA* Quick Sequential Organ Failure Assessment, *AUC* Area under the curve, *PR* Precision recall, *ROC* Receiver Operating Characteristics

**Figure S2**

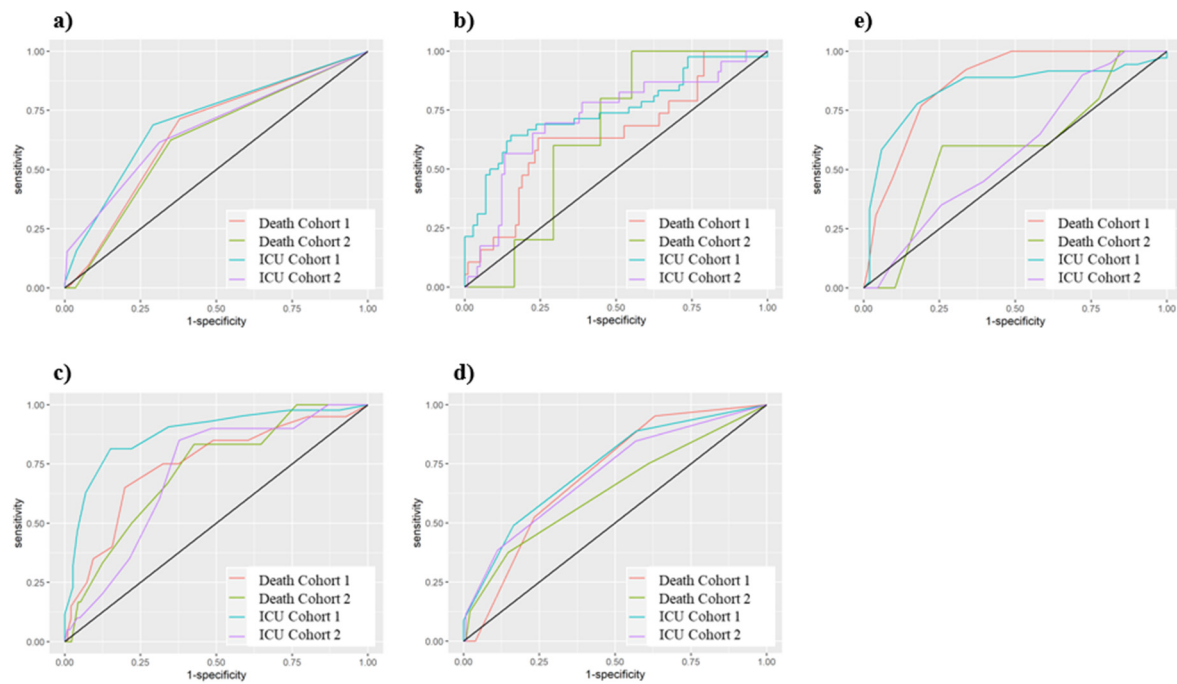

**Figure S2.** Plots of Area under the receiver operating characteristics of qSOFA (a), COVID-GRAM (b), NEWS (c), CRB-65 (d) and 4C-Score (e) with regard to ICU admission and in-hospital mortality in the first and the second cohort. Abbreviations: *ICU* Intensive Care Unit
